# Supplementary material for: N-doped graphitized porous carbon derived from N-rich polymer for improved supercapacitor performance
Source: Royal Society of Chemistry journal article supplement (doi:10.1039/d2nj01685k), 2022-01-01
Supplement: d2nj01685k1.pdf [file d2nj01685k1.pdf]

## Supplementary Information

N-doped graphitized porous carbon derived from N-rich  
polymer for improved supercapacitor performance

*Jianqing Bian, Mengmeng Zheng, Qibin Chen\* and Honglai Liu*

*State Key Laboratory of Chemical Engineering and School of Chemistry & Molecular*

*Engineering, East China University of Science and Technology, Shanghai, 200237, P.*

*R. China*

\*Corresponding author E-mail: [qibinchen@ecust.edu.cn](mailto:qibinchen@ecust.edu.cn)

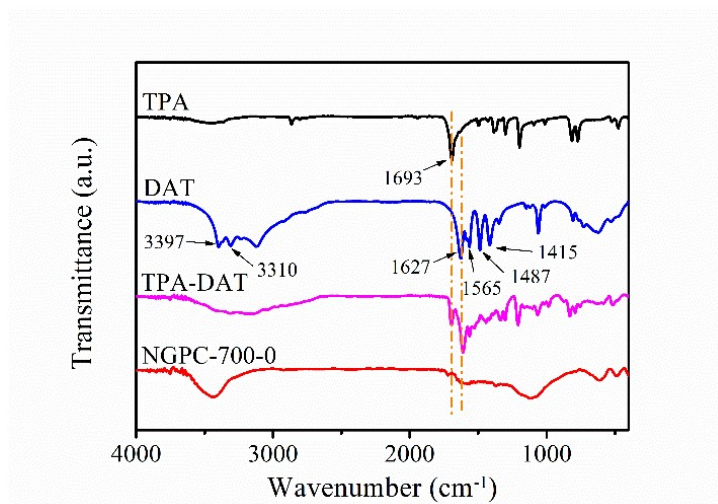

Fig. S1 FT-IR spectra of the monomers (TPA and DAT), TPA-DAT and the derived carbon material (NGPC-700-0).

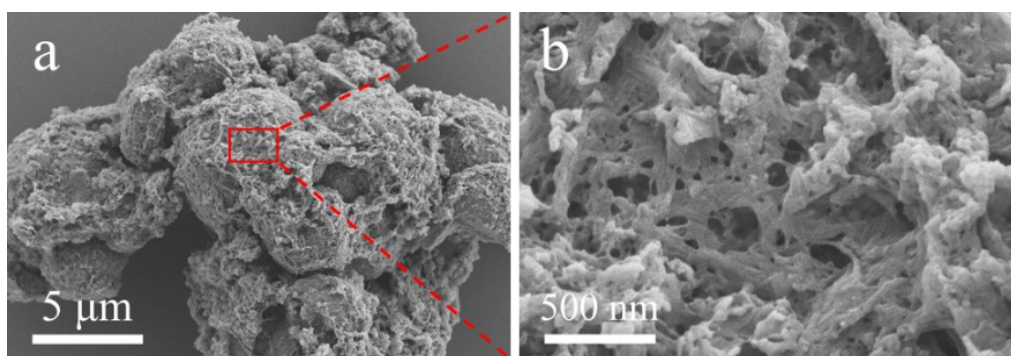

Fig. S2 SEM images of TPA-DAT.

Table S1. Porosity parameters and element contents of NGPCs.

| Sample       | SSA ( $\text{m}^2 \text{g}^{-1}$ ) |                    | Pore volume ( $\text{cm}^3 \text{g}^{-1}$ ) |                    |                         | $D_{\text{aver}}$<br>(nm) | Element content (at%) |       |       |
|--------------|------------------------------------|--------------------|---------------------------------------------|--------------------|-------------------------|---------------------------|-----------------------|-------|-------|
|              | $S_{\text{BET}}$                   | $S_{\text{micro}}$ | $V_{\text{total}}$                          | $V_{\text{micro}}$ | $V_{\text{meso/macro}}$ |                           | C                     | N     | O     |
| NGPC-700-0   | 96.6                               | 58.2               | 0.18                                        | 0.03               | 0.15                    | -                         | 83.34                 | 12.82 | 3.84  |
| NGPC-600-1   | 1470.2                             | 981.2              | 0.78                                        | 0.45               | 0.33                    | 2.11                      | 81.70                 | 7.92  | 10.38 |
| NGPC-700-0.5 | 1270.6                             | 789.3              | 0.70                                        | 0.39               | 0.31                    | 2.21                      | 78.80                 | 8.86  | 12.34 |
| NGPC-700-1   | 2123.7                             | 1248.9             | 1.30                                        | 0.58               | 0.72                    | 2.45                      | 85.60                 | 6.20  | 8.20  |
| NGPC-700-2   | 1719.7                             | 935.2              | 1.51                                        | 0.46               | 1.05                    | 3.52                      | 89.16                 | 3.40  | 7.44  |
| NGPC-800-1   | 2258.5                             | 1052.3             | 1.48                                        | 0.53               | 0.95                    | 4.10                      | 88.07                 | 1.87  | 10.06 |

Table S2. The electrochemical parameters of NGPCs.

| Sample       | Specific capacitance  |                      | Capacitance retention (%) | $R_s$ ( $\Omega$ ) | $R_{ct}$ ( $\Omega$ ) | Phase angle ( $^\circ$ ) | $\tau_0$ (s) |
|--------------|-----------------------|----------------------|---------------------------|--------------------|-----------------------|--------------------------|--------------|
|              | 0.5 A g <sup>-1</sup> | 50 A g <sup>-1</sup> |                           |                    |                       |                          |              |
| NGPC-700-0   | 113.2                 | 57.6                 | 50.9                      | 0.57               | 0.56                  | -73.2                    | -            |
| NGPC-600-1   | 269.1                 | 198.6                | 73.8                      | 0.53               | 0.25                  | -84.4                    | 0.63         |
| NGPC-700-0.5 | 257.5                 | 190.7                | 74.1                      | 0.54               | 0.19                  | -82.2                    | 0.63         |
| NGPC-700-1   | 322.7                 | 255.4                | 79.1                      | 0.52               | 0.13                  | -85.4                    | 0.28         |
| NGPC-700-2   | 225.2                 | 173.5                | 77.0                      | 0.47               | 0.18                  | -83.5                    | 0.40         |
| NGPC-800-1   | 231.6                 | 181.6                | 78.4                      | 0.50               | 0.20                  | -84.8                    | 0.35         |

Table S3. Performance comparison with other N doped carbon materials for supercapacitor electrode materials.

| Sample                                    | $S_{BET}$ (m <sup>2</sup> g <sup>-1</sup> ) | Nitrogen content (at%) | Specific capacitance                             | Rate capability                | Electrolyte                        | Ref.      |
|-------------------------------------------|---------------------------------------------|------------------------|--------------------------------------------------|--------------------------------|------------------------------------|-----------|
| N-doped porous carbon nanofiber aerogel   | 401.8                                       | 2.68                   | 279 F g <sup>-1</sup> (0.5 A g <sup>-1</sup> )   | 59% (20 A g <sup>-1</sup> )    | 1 M H <sub>2</sub> SO <sub>4</sub> | [1]       |
| Nitrogen-doped holey carbon nanosheet     | 701.7                                       | 5.30                   | 205 F g <sup>-1</sup> (0.5 A g <sup>-1</sup> )   | 67% (20 A g <sup>-1</sup> )    | 6 M KOH                            | [2]       |
| Nitrogen-doped hierarchical porous carbon | 2160                                        | 5.79                   | 283 F g <sup>-1</sup> (0.1 A g <sup>-1</sup> )   | 61.8% (150 A g <sup>-1</sup> ) | 6 M KOH                            | [3]       |
| N-doped porous carbon nanosheet           | 879                                         | 3.73                   | 263 F g <sup>-1</sup> (1 A g <sup>-1</sup> )     | 73.8% (20 A g <sup>-1</sup> )  | 2 M KOH                            | [4]       |
| Nitrogen-doped ordered mesoporous carbon  | 272                                         | 24.1                   | 382 F g <sup>-1</sup> (0.5 A g <sup>-1</sup> )   | 61.4% (20 A g <sup>-1</sup> )  | 1 M H <sub>2</sub> SO <sub>4</sub> | [5]       |
| Porous nitrogen-doped carbon              | 2453                                        | 6.95                   | 306.5 F g <sup>-1</sup> (0.5 A g <sup>-1</sup> ) | 70.3% (50 A g <sup>-1</sup> )  | 6 M KOH                            | [6]       |
| Nitrogen-enriched nanoporous carbon       | 533                                         | 18.06                  | 306 F g <sup>-1</sup> (0.5 A g <sup>-1</sup> )   | 72.4% (30 A g <sup>-1</sup> )  | 6 M KOH                            | [7]       |
| N-doped microporous /mesoporous carbon    | 1969                                        | 0.3                    | 261.6 F g <sup>-1</sup> (0.5 A g <sup>-1</sup> ) | 78% (10 A g <sup>-1</sup> )    | 6 M KOH                            | [8]       |
| N-doped microporous carbon hollow sphere  | 1524                                        | 6.37                   | 326 F g <sup>-1</sup> (0.5 A g <sup>-1</sup> )   | 30.7% (50 A g <sup>-1</sup> )  | 6 M KOH                            | [9]       |
| Nitrogen-doped graphitized porous carbon  | 2123.7                                      | 6.20                   | 322.7 F g <sup>-1</sup> (0.5 A g <sup>-1</sup> ) | 79.1% (50 A g <sup>-1</sup> )  | 6 M KOH                            | This work |

Table S4. Supercapacitive performance comparison with other carbon materials derived from Schiff-base polymer.

| Sample                                   | Activator                | $S_{\text{BET}}$<br>( $\text{m}^2 \text{g}^{-1}$ ) | Specific capacitance                                | Rate capability                  | Electrolyte                  | Ref.      |
|------------------------------------------|--------------------------|----------------------------------------------------|-----------------------------------------------------|----------------------------------|------------------------------|-----------|
| Porous carbon spheres                    | KOH                      | 1302                                               | 344 $\text{F g}^{-1}$<br>(1 $\text{A g}^{-1}$ )     | 61.0%<br>(20 $\text{A g}^{-1}$ ) | 6 M KOH                      | [10]      |
| N-doped microporous carbon spheres       | KOH                      | 1478                                               | 292 $\text{F g}^{-1}$<br>(1 $\text{A g}^{-1}$ )     | 68.5%<br>(20 $\text{A g}^{-1}$ ) | 6 M KOH                      | [11]      |
| N, O codoped carbon nanospheres          | KOH                      | 2660                                               | 376 $\text{F g}^{-1}$<br>(0.5 $\text{A g}^{-1}$ )   | 54.8%<br>(50 $\text{A g}^{-1}$ ) | 6 M KOH                      | [12]      |
| N/O co-doped porous carbons              | KOH                      | 1656                                               | 292 $\text{F g}^{-1}$<br>(0.5 $\text{A g}^{-1}$ )   | 57.2%<br>(50 $\text{A g}^{-1}$ ) | 6 M KOH                      | [13]      |
| N-doped porous carbon materials          | KOH                      | 1164                                               | 297 $\text{F g}^{-1}$<br>(0.5 $\text{A g}^{-1}$ )   | 62.6%<br>(20 $\text{A g}^{-1}$ ) | 1 M $\text{Na}_2\text{SO}_4$ | [14]      |
| Hierarchical porous carbons              | $\text{ZnCl}_2$          | 1203                                               | 301 $\text{F g}^{-1}$<br>(1 $\text{A g}^{-1}$ )     | 72.4%<br>(30 $\text{A g}^{-1}$ ) | 6 M KOH                      | [15]      |
| N-doped porous carbon nanorods           | $\text{CuCl}_2$          | 2048.7                                             | 271 $\text{F g}^{-1}$<br>(0.5 $\text{A g}^{-1}$ )   | 64.6%<br>(20 $\text{A g}^{-1}$ ) | 6 M KOH                      | [16]      |
|                                          | KOH                      | 3291.8                                             | 126 $\text{F g}^{-1}$<br>(0.5 $\text{A g}^{-1}$ )   | 75.4%<br>(20 $\text{A g}^{-1}$ ) |                              |           |
| N/O co-doped carbon nanospheres          | $\text{CuCl}_2$          | 2957.8                                             | 273.9 $\text{F g}^{-1}$<br>(0.5 $\text{A g}^{-1}$ ) | 65.8%<br>(20 $\text{A g}^{-1}$ ) | 6 M KOH                      | [17]      |
| Nitrogen-doped graphitized porous carbon | $\text{K}_2\text{FeO}_4$ | 2123.7                                             | 322.7 $\text{F g}^{-1}$<br>(0.5 $\text{A g}^{-1}$ ) | 79.1%<br>(50 $\text{A g}^{-1}$ ) | 6 M KOH                      | This work |

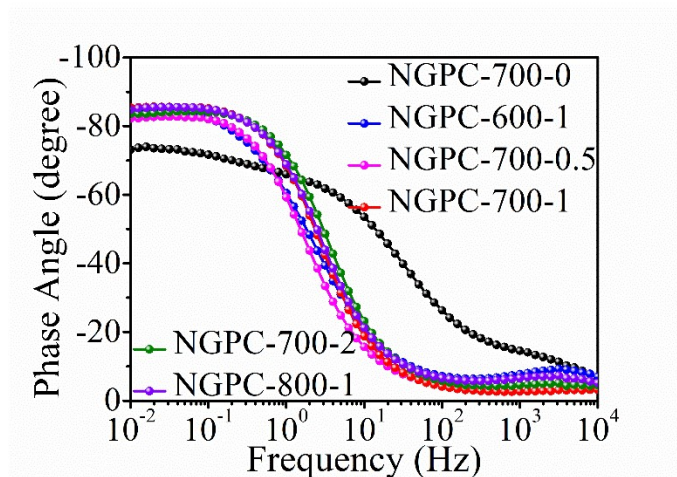

Fig. S3 The bode plots of NGPCs.

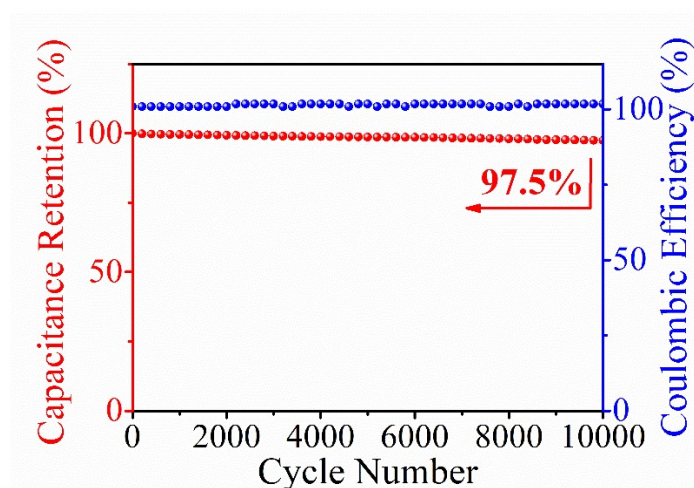

Fig. S4 The stability evaluation of NGPC-700-1 at 10 A g<sup>-1</sup>.

## References

- 1 Y. Yang, Y. Liu, Y. Li, B. Deng, B. Yin and M. Yang, *J. Mater. Chem. A*, 2020, **8**, 17257-17265.
- 2 H. Peng, S. Qi, Q. Miao, R. Zhao, Y. Xu, G. Ma and Z. Lei, *J. Power Sources*, 2021, **482**, 228993.
- 3 L. Wang, Q. Zhu, J. Zhao, Y. Guan, J. Liu, Z. An and B. Xu, *Microporous Mesoporous Mater.*, 2019, **279**, 439-445.
- 4 Z. Wang, K. Wang, Y. Wang, S. Wang, Z. Chen, J. Chen and J. Fu, *Nanoscale*, 2019, **11**, 8785-8797.
- 5 M. Xie, H. Meng, J. Chen, Y. Zhang, C. Du, L. Wan and Y. Chen, *ACS Appl. Energy Mater.*, 2021, **4**, 1840-1850.
- 6 T. Wang, J. Guo, Y. Guo, J. Feng and D. Wu, *ACS Appl. Energy Mater.*, 2021, **4**, 2190-2200.
- 7 D. Guo, J. Qian, R. Xin, Z. Zhang, W. Jiang, G. Hu and M. Fan, *J. Colloid Interface Sci.*, 2019, **538**, 199-208.
- 8 J. K. Guo, J. Liu and L. B. Kong, *ChemElectroChem*, 2020, **7**, 2592-2598.
- 9 D. Liu, L. T. Tufa and J. Lee, *Electrochim. Acta*, 2019, **313**, 389-396.
- 10 D. Xue, D. Zhu, W. Xiong, T. Cao, Z. Wang, Y. Lv, L. Li, M. Liu and L. Gan, *ACS Sustainable Chem. Eng.*, 2019, **7**, 7024-7034.
- 11 D. Zhu, J. Jiang, D. Sun, X. Qian, Y. Wang, L. Li, Z. Wang, X. Chai, L. Gan and

- M. Liu, *J. Mater. Chem. A*, 2018, **6**, 12334-12343.
- 12 Z. Song, D. Zhu, L. Li, T. Chen, H. Duan, Z. Wang, Y. Lv, W. Xiong, M. Liu and L. Gan, *J. Mater. Chem. A*, 2019, **7**, 1177-1186.
- 13 B. Tang, L. Zheng, X. Dai and H. Chen, *J. Energy Storage*, 2019, **26**, 100961.
- 14 M. Wang, J. Zhao, D. Zhang, Z. Chen, J. Zheng, P. Zhang, K. Deng, *J. Electroanal. Chem.*, 2022, **908**, 116109.
- 15 J. Wei, H. Ding, Y. Wang and H. Xiong, *ACS Appl. Mater. Interfaces*, 2015, **7**, 5811-5819.
- 16 L. Zheng, B. Tang, X. Dai, T. Xing, Y. Ouyang, Y. Wang, B. Chang, H. Shu and X. Wang, *Chem. Eng. J.*, 2020, **399**, 125671.
- 17 L. Zheng, X. Dai, Y. Ouyang, Y. Chen and X. Wang, *J. Energy Storage*, 2021, **33**, 102152.
